# Supplementary material
Source: PubMed Central journal article supplement (PMC4321279)
Supplement: pnas.201414000SI.pdf [file pnas.201414000SI.pdf]

# Supporting Information

Seehagen et al. 10.1073/pnas.1414000112

**Table S1.** Percentage of infants in the baseline, nap, and no-nap condition who performed each of the three target actions (remove, shake, replace) at test in Exp. 1 and 2

| Experiment     | Condition | Remove | Shake | Replace |
|----------------|-----------|--------|-------|---------|
| 1 (4-h delay)  | Baseline  | 7.5    | 2.5   | 5       |
|                | Nap       | 40     | 27.5  | 30      |
|                | No-nap    | 25     | 10    | 20      |
| 2 (24-h delay) | Baseline  | 6.25   | 3.13  | 3.13    |
|                | Nap       | 43.75  | 28.13 | 25      |
|                | No-nap    | 21.88  | 3.13  | 12.5    |

**Table S2.** Mean imitation scores (SD) and number of participants per condition and age-group for each experiment

| Age group | Experiment 1 |               |          |               |          |               | Experiment 2 |               |          |               |          |               |
|-----------|--------------|---------------|----------|---------------|----------|---------------|--------------|---------------|----------|---------------|----------|---------------|
|           | Nap          |               | No-nap   |               | Baseline |               | Nap          |               | No-nap   |               | Baseline |               |
|           | <i>n</i>     | <i>M</i> (SD) | <i>n</i> | <i>M</i> (SD) | <i>n</i> | <i>M</i> (SD) | <i>n</i>     | <i>M</i> (SD) | <i>n</i> | <i>M</i> (SD) | <i>n</i> | <i>M</i> (SD) |
| 6 mo      | 20           | 1 (1.34)      | 20       | 0.4 (0.82)    | 20       | 0.05 (0.22)   | 16           | 1.06 (1.34)   | 16       | 0.19 (0.54)   | 16       | 0.19 (0.75)   |
| 12 mo     | 20           | 0.95 (1.28)   | 20       | 0.7 (1.13)    | 20       | 0.25 (0.79)   | 16           | 0.88 (1.01)   | 16       | 0.56 (0.89)   | 16       | 0.06 (0.25)   |
